# Supplementary material for: Sex-specific association between low oral doses of cannabidiol (CBD) and plasma concentration of anandamide (AEA), N-palmitoylethanolamine (PEA) and N-oleoylethanolamine (OEA) in healthy occasional cannabis users
Source: Springer Nature journal article supplement (doi:10.1186/s42238-025-00356-x), 2026-01-09

## Online Supplementary Material

**Title: Sex-Specific association between low oral doses of cannabidiol (CBD) and plasma concentration of anandamide (AEA), N-palmitoylethanolamine (PEA) and N-oleoylethanolamine (OEA) in healthy occasional cannabis users**

Anita Abboud<sup>1,2</sup>, Lucy Chester<sup>1,2</sup>, Francois-Olivier Hébert<sup>2</sup>, and Didier Jutras-Aswad\*<sup>1,2</sup>

<sup>1</sup>Department of Psychiatry and Addictology, Université de Montréal, Montréal, Québec, Canada;

<sup>2</sup>Research Centre, Centre hospitalier de l'Université de Montréal, Montréal, Québec, Canada;

Corresponding author:

Didier Jutras-Aswad

[didier.jutras-aswad@umontreal.ca](mailto:didier.jutras-aswad@umontreal.ca)

## Table of contents

|                                                                                                 |    |
|-------------------------------------------------------------------------------------------------|----|
| Supplementary Table S1: Results from GLMM model 1 .....                                         | 3  |
| Supplementary Table S2: <i>Post-hoc</i> exploratory subgroup analysis by sex using Model 1..... | 5  |
| Supplementary Table S3: Results from GLMM model 2.....                                          | 7  |
| Supplementary Table S4: <i>Post-hoc</i> exploratory subgroup analysis by sex using Model 2..... | 9  |
| Supplementary Figure S1. Individual Trajectories of Plasma AEA Levels .....                     | 11 |
| Supplementary Figure S2. Individual Trajectories of Plasma PEA Levels .....                     | 12 |
| Supplementary Figure S3. Individual Trajectories of Plasma OEA Levels .....                     | 13 |
| Supplementary Method S1: Analytical Methodology for AEA .....                                   | 14 |
| Supplementary Method S2: Analytical Methodology for PEA and OEA .....                           | 20 |

Supplementary Table S1: Results from GLMM model 1 showing the association between Cmin and CBD doses for each analyte.

| AEA                |               | Estimate | SE    | t value | p-value                 |
|--------------------|---------------|----------|-------|---------|-------------------------|
| <b>(Intercept)</b> |               | 0.099    | 0.015 | 6.750   |                         |
| <b>Dose</b>        |               |          |       |         | 0.501                   |
|                    | <b>20 mg</b>  | -0.001   | 0.009 | -0.119  |                         |
|                    | <b>50 mg</b>  | -0.004   | 0.009 | -0.451  |                         |
|                    | <b>100 mg</b> | -0.002   | 0.009 | -0.225  |                         |
|                    | <b>200 mg</b> | -0.014   | 0.009 | -1.603  |                         |
| <b>Visit</b>       |               |          |       |         | <b>0.000 ***</b>        |
|                    | <b>V2</b>     | 0.029    | 0.009 | 3.258   |                         |
|                    | <b>V3</b>     | 0.029    | 0.009 | 3.261   |                         |
|                    | <b>V4</b>     | 0.041    | 0.009 | 4.573   |                         |
|                    | <b>V5</b>     | 0.026    | 0.009 | 2.895   |                         |
| <b>Sex</b>         |               | -0.036   | 0.007 | -4.848  | <b>0.000 ***</b>        |
| <b>T0</b>          |               | 0.330    | 0.030 | 10.947  | <b>&lt; 2.2e-16 ***</b> |
| <b>PEA</b>         |               |          |       |         |                         |
| <b>(Intercept)</b> |               | 0.616    | 0.065 | 9.470   |                         |
| <b>Dose</b>        |               |          |       |         | 0.302                   |
|                    | <b>20 mg</b>  | -0.036   | 0.034 | -1.066  |                         |
|                    | <b>50 mg</b>  | -0.058   | 0.034 | -1.709  |                         |
|                    | <b>100 mg</b> | -0.040   | 0.034 | -1.169  |                         |
|                    | <b>200 mg</b> | -0.070   | 0.034 | -2.037  |                         |
| <b>Visit</b>       |               |          |       |         | 0.458                   |
|                    | <b>V2</b>     | 0.028    | 0.035 | 0.813   |                         |
|                    | <b>V3</b>     | 0.027    | 0.035 | 0.787   |                         |
|                    | <b>V4</b>     | 0.054    | 0.035 | 1.552   |                         |
|                    | <b>V5</b>     | -0.003   | 0.034 | -0.084  |                         |
| <b>Sex</b>         |               | -0.151   | 0.040 | -3.761  | <b>0.000 ***</b>        |
| <b>T0</b>          |               | 0.258    | 0.028 | 9.330   | <b>&lt;2e-16 ***</b>    |
| <b>OEA</b>         |               |          |       |         |                         |
| <b>(Intercept)</b> |               | 0.497    | 0.051 | 9.763   |                         |
| <b>Dose</b>        |               |          |       |         | 0.110                   |
|                    | <b>20 mg</b>  | -0.048   | 0.031 | -1.570  |                         |
|                    | <b>50 mg</b>  | -0.082   | 0.031 | -2.664  |                         |
|                    | <b>100 mg</b> | -0.045   | 0.031 | -1.476  |                         |
|                    | <b>200 mg</b> | -0.058   | 0.031 | -1.879  |                         |
| <b>Visit</b>       |               |          |       |         | 0.382                   |
|                    | <b>V2</b>     | 0.013    | 0.031 | 0.425   |                         |
|                    | <b>V3</b>     | 0.029    | 0.031 | 0.920   |                         |
|                    | <b>V4</b>     | 0.058    | 0.032 | 1.825   |                         |
|                    | <b>V5</b>     | 0.009    | 0.031 | 0.276   |                         |

|                                                                                                                                                                                                                          |  |        |       |        |                      |
|--------------------------------------------------------------------------------------------------------------------------------------------------------------------------------------------------------------------------|--|--------|-------|--------|----------------------|
| <b>Sex</b>                                                                                                                                                                                                               |  | -0.081 | 0.029 | -2.765 | <b>0.006 *</b>       |
| <b>T0</b>                                                                                                                                                                                                                |  | 0.196  | 0.024 | 8.290  | <b>3.481e-15 ***</b> |
| <b>AEA, anandamide; Cmin, Minimum Concentration; OEA, oleoylethanolamide; PEA, palmitoylethanolamide; SE, Standard Error; T0, Pre-ingestion timepoint</b><br><b>* Signifies p &lt; 0.050; *** Signifies p &lt; 0.001</b> |  |        |       |        |                      |

**Visit effect:** A significant visit effect was observed for AEA Cmin ( $p < 0.001$ ), with post-hoc analyses showing this effect specifically for visit 4 compared to visit 1 (Cohen's  $d = -0.7835$ , 95% CI [-1.1321; -0.435]).

Supplementary Table S2: *Post-hoc* exploratory subgroup analysis by sex using Model 1.

|             |        | Males    |       |         |                  | Females  |       |         |                  |
|-------------|--------|----------|-------|---------|------------------|----------|-------|---------|------------------|
| AEA         |        | Estimate | SE    | t value | p-value          | Estimate | SE    | t value | p-value          |
| (Intercept) |        | 0.088    | 0.024 | 3.748   |                  | 0.070    | 0.018 | 3.884   |                  |
| Dose        |        |          |       |         | 0.693            |          |       |         | 0.502            |
|             | 20 mg  | -0.013   | 0.014 | -0.934  |                  | 0.010    | 0.012 | 0.833   |                  |
|             | 50 mg  | -0.011   | 0.014 | -0.782  |                  | 0.004    | 0.012 | 0.318   |                  |
|             | 100 mg | -0.008   | 0.014 | -0.591  |                  | 0.003    | 0.012 | 0.259   |                  |
|             | 200 mg | -0.020   | 0.014 | -1.450  |                  | -0.011   | 0.012 | -0.947  |                  |
| Visit       |        |          |       |         | 0.066 .          |          |       |         | 0.009 *          |
|             | V2     | 0.034    | 0.014 | 2.417   |                  | 0.023    | 0.012 | 1.953   |                  |
|             | V3     | 0.028    | 0.014 | 2.039   |                  | 0.029    | 0.012 | 2.401   |                  |
|             | V4     | 0.037    | 0.014 | 2.650   |                  | 0.044    | 0.012 | 3.613   |                  |
|             | V5     | 0.023    | 0.014 | 1.657   |                  | 0.024    | 0.012 | 2.027   |                  |
| T0          |        | 0.383    | 0.053 | 7.290   | 3.097e-13<br>*** | 0.295    | 0.037 | 7.885   | 3.135e-15<br>*** |
| PEA         |        |          |       |         |                  |          |       |         |                  |
| (Intercept) |        | 0.559    | 0.093 | 5.990   |                  | 0.489    | 0.085 | 5.741   |                  |
| Dose        |        |          |       |         | 0.809            |          |       |         | 0.211            |
|             | 20 mg  | -0.033   | 0.049 | -0.677  |                  | -0.031   | 0.046 | -0.662  |                  |
|             | 50 mg  | -0.027   | 0.051 | -0.522  |                  | -0.064   | 0.047 | -1.359  |                  |
|             | 100 mg | -0.062   | 0.051 | -1.231  |                  | -0.023   | 0.047 | -0.489  |                  |
|             | 200 mg | -0.040   | 0.050 | -0.802  |                  | -0.104   | 0.047 | -2.199  |                  |
| Visit       |        |          |       |         | 0.504            |          |       |         | 0.087 .          |
|             | V2     | 0.004    | 0.051 | 0.081   |                  | 0.052    | 0.047 | 1.115   |                  |
|             | V3     | -0.073   | 0.050 | -1.481  |                  | 0.101    | 0.049 | 2.076   |                  |
|             | V4     | -0.002   | 0.051 | -0.031  |                  | 0.101    | 0.048 | 2.101   |                  |
|             | V5     | -0.025   | 0.050 | -0.503  |                  | 0.008    | 0.048 | 0.171   |                  |
| T0          |        | 0.312    | 0.043 | 7.233   | 4.733e-13<br>*** | 0.228    | 0.037 | 6.209   | 5.334e-10<br>*** |
| OEA         |        |          |       |         |                  |          |       |         |                  |

|                                                                                                                                                                                                                                                    |               |        |       |        |                         |        |       |        |                         |
|----------------------------------------------------------------------------------------------------------------------------------------------------------------------------------------------------------------------------------------------------|---------------|--------|-------|--------|-------------------------|--------|-------|--------|-------------------------|
| <b>(Intercept)</b>                                                                                                                                                                                                                                 |               | 0.461  | 0.074 | 6.232  |                         | 0.421  | 0.070 | 6.029  |                         |
| <b>Dose</b>                                                                                                                                                                                                                                        |               |        |       |        | 0.901                   |        |       |        | 0.085 .                 |
|                                                                                                                                                                                                                                                    | <b>20 mg</b>  | -0.044 | 0.046 | -0.947 |                         | -0.047 | 0.041 | -1.138 |                         |
|                                                                                                                                                                                                                                                    | <b>50 mg</b>  | -0.038 | 0.048 | -0.788 |                         | -0.108 | 0.042 | -2.583 |                         |
|                                                                                                                                                                                                                                                    | <b>100 mg</b> | -0.034 | 0.047 | -0.710 |                         | -0.062 | 0.042 | -1.468 |                         |
|                                                                                                                                                                                                                                                    | <b>200 mg</b> | -0.026 | 0.047 | -0.547 |                         | -0.094 | 0.042 | -2.235 |                         |
| <b>Visit</b>                                                                                                                                                                                                                                       |               |        |       |        | 0.721                   |        |       |        | 0.175                   |
|                                                                                                                                                                                                                                                    | <b>V2</b>     | -0.003 | 0.048 | -0.071 |                         | 0.038  | 0.042 | 0.897  |                         |
|                                                                                                                                                                                                                                                    | <b>V3</b>     | -0.041 | 0.046 | -0.890 |                         | 0.083  | 0.044 | 1.906  |                         |
|                                                                                                                                                                                                                                                    | <b>V4</b>     | 0.026  | 0.048 | 0.549  |                         | 0.095  | 0.044 | 2.162  |                         |
|                                                                                                                                                                                                                                                    | <b>V5</b>     | -0.008 | 0.047 | -0.174 |                         | 0.031  | 0.043 | 0.733  |                         |
| <b>T0</b>                                                                                                                                                                                                                                          |               | 0.228  | 0.038 | 6.041  | <b>1.534e-09</b><br>*** | 0.184  | 0.031 | 5.899  | <b>3.656e-09</b><br>*** |
| <b>AEA, anandamide; Cmin, Minimum Concentration; OEA, oleoylethanolamide; PEA, palmitoylethanolamide; SE, Standard Error; T0, Pre-ingestion timepoint</b><br><b>. Signifies p &lt; 0.100; * Signifies p &lt; 0.050; *** Signifies p &lt; 0.001</b> |               |        |       |        |                         |        |       |        |                         |

Supplementary Table S3: Results from GLMM model 2 showing the association between AUCi and CBD doses for each analyte.

| AEA                |               | Estimate | SE     | t value | p-value               |
|--------------------|---------------|----------|--------|---------|-----------------------|
| <b>(Intercept)</b> |               | 37.162   | 4.711  | 7.888   |                       |
| <b>Dose</b>        |               |          |        |         | <b>0.810</b>          |
|                    | <b>20 mg</b>  | -2.096   | 2.816  | -0.744  |                       |
|                    | <b>50 mg</b>  | -2.062   | 2.845  | -0.725  |                       |
|                    | <b>100 mg</b> | -0.439   | 2.828  | -0.155  |                       |
|                    | <b>200 mg</b> | -3.046   | 2.845  | -1.071  |                       |
| <b>Visit</b>       |               |          |        |         | <b>0.014 *</b>        |
|                    | <b>V2</b>     | 6.675    | 2.879  | 2.319   |                       |
|                    | <b>V3</b>     | 5.077    | 2.859  | 1.776   |                       |
|                    | <b>V4</b>     | 9.975    | 2.873  | 3.472   |                       |
|                    | <b>V5</b>     | 4.972    | 2.827  | 1.759   |                       |
| <b>Sex</b>         |               | -11.813  | 2.402  | -4.918  | <b>8.76e-07 ***</b>   |
| <b>T0</b>          |               | -187.273 | 9.675  | -19.356 | <b>&lt; 2e-16 ***</b> |
| <b>PEA</b>         |               |          |        |         |                       |
| <b>(Intercept)</b> |               | 281.659  | 24.3   | 11.591  |                       |
| <b>Dose</b>        |               |          |        |         | <b>0.019 *</b>        |
|                    | <b>20 mg</b>  | -29.417  | 12.485 | -2.356  |                       |
|                    | <b>50 mg</b>  | -37.859  | 12.588 | -3.008  |                       |
|                    | <b>100 mg</b> | -19.906  | 12.523 | -1.59   |                       |
|                    | <b>200 mg</b> | -34.848  | 12.584 | -2.769  |                       |
| <b>Visit</b>       |               |          |        |         | <b>0.854</b>          |
|                    | <b>V2</b>     | 13.386   | 12.738 | 1.051   |                       |
|                    | <b>V3</b>     | 6.295    | 12.73  | 0.495   |                       |
|                    | <b>V4</b>     | 11.507   | 12.8   | 0.899   |                       |
|                    | <b>V5</b>     | 6.291    | 12.577 | 0.5     |                       |
| <b>Sex</b>         |               | -45.755  | 15.478 | -2.956  | <b>0.003 *</b>        |
| <b>T0</b>          |               | -221.857 | 10.299 | -21.542 | <b>&lt; 2e-16 ***</b> |
| <b>OEA</b>         |               |          |        |         |                       |
| <b>(Intercept)</b> |               | 216.780  | 19.103 | 11.348  |                       |
| <b>Dose</b>        |               |          |        |         | <b>0.014 *</b>        |
|                    | <b>20 mg</b>  | -23.890  | 11.073 | -2.158  |                       |
|                    | <b>50 mg</b>  | -38.653  | 11.163 | -3.463  |                       |
|                    | <b>100 mg</b> | -20.756  | 11.116 | -1.867  |                       |
|                    | <b>200 mg</b> | -25.614  | 11.155 | -2.296  |                       |
| <b>Visit</b>       |               |          |        |         | <b>0.511</b>          |
|                    | <b>V2</b>     | 8.088    | 11.409 | 0.709   |                       |
|                    | <b>V3</b>     | 16.192   | 11.312 | 1.431   |                       |
|                    | <b>V4</b>     | 18.641   | 11.525 | 1.617   |                       |
|                    | <b>V5</b>     | 11.630   | 11.211 | 1.037   |                       |

|                                                                                                                                                                                                                                                               |  |          |        |         |                       |
|---------------------------------------------------------------------------------------------------------------------------------------------------------------------------------------------------------------------------------------------------------------|--|----------|--------|---------|-----------------------|
| <b>Sex</b>                                                                                                                                                                                                                                                    |  | -29.958  | 11.812 | -2.536  | <b>0.011 *</b>        |
| <b>T0</b>                                                                                                                                                                                                                                                     |  | -237.486 | 8.821  | -26.922 | <b>&lt; 2e-16 ***</b> |
| <b>AEA, anandamide; AUCi, Area Under the Curve to increase; OEA, oleoylethanolamide; PEA, palmitoylethanolamide; SE, Standard Error; T0, Pre-ingestion timepoint</b><br><b>. Signifies p &lt; 0.100; * Signifies p &lt; 0.050; *** Signifies p &lt; 0.001</b> |  |          |        |         |                       |

**Visit effect:** A significant visit effect was observed for AEA AUCi ( $p < 0.001$ ), with post-hoc analyses showing this effect specifically for visit 4 compared to visit 1 (Cohen's  $d = -0.585$ , 95% CI [-0.9318, -0.2389]).

Supplementary Table S4: *Post-hoc* exploratory subgroup analysis by sex using Model 2.

|                    |               | Males    |        |         |             | Females  |        |         |             |
|--------------------|---------------|----------|--------|---------|-------------|----------|--------|---------|-------------|
| AEA                |               | Estimate | SE     | t value | p-value     | Estimate | SE     | t value | p-value     |
| <b>(Intercept)</b> |               | 31.530   | 7.234  | 4.358   |             | 28.323   | 6.029  | 4.697   |             |
| <b>Dose</b>        |               |          |        |         | 0.575       |          |        |         | 0.917       |
|                    | <b>20 mg</b>  | -4.292   | 4.140  | -1.037  |             | 0.151    | 3.918  | 0.039   |             |
|                    | <b>50 mg</b>  | -2.240   | 4.355  | -0.514  |             | -1.108   | 3.983  | -0.278  |             |
|                    | <b>100 mg</b> | 2.021    | 4.251  | 0.475   |             | -1.959   | 3.981  | -0.492  |             |
|                    | <b>200 mg</b> | -2.907   | 4.179  | -0.696  |             | -3.169   | 3.992  | -0.794  |             |
| <b>Visit</b>       |               |          |        |         | 0.082 .     |          |        |         | 0.228       |
|                    | <b>V2</b>     | 9.346    | 4.272  | 2.188   |             | 4.786    | 4.024  | 1.189   |             |
|                    | <b>V3</b>     | 6.037    | 4.159  | 1.452   |             | 4.559    | 4.056  | 1.124   |             |
|                    | <b>V4</b>     | 11.512   | 4.248  | 2.710   |             | 9.591    | 4.059  | 2.363   |             |
|                    | <b>V5</b>     | 6.324    | 4.230  | 1.495   |             | 4.201    | 4.020  | 1.045   |             |
| <b>T0</b>          |               | -173.897 | 16.155 | -10.765 | < 2e-16 *** | -195.124 | 12.463 | -15.657 | < 2e-16 *** |
| <b>PEA</b>         |               |          |        |         |             |          |        |         |             |
| <b>(Intercept)</b> |               | 256.967  | 32.298 | 7.956   |             | 247.416  | 33.558 | 7.373   |             |
| <b>Dose</b>        |               |          |        |         | 0.586       |          |        |         | 0.050 .     |
|                    | <b>20 mg</b>  | -24.797  | 16.551 | -1.498  |             | -30.848  | 18.408 | -1.676  |             |
|                    | <b>50 mg</b>  | -21.037  | 17.282 | -1.217  |             | -44.417  | 18.717 | -2.373  |             |
|                    | <b>100 mg</b> | -22.566  | 16.982 | -1.329  |             | -15.463  | 18.721 | -0.826  |             |
|                    | <b>200 mg</b> | -19.515  | 16.700 | -1.169  |             | -48.517  | 18.689 | -2.596  |             |
| <b>Visit</b>       |               |          |        |         | 0.502       |          |        |         | 0.652       |
|                    | <b>V2</b>     | 8.931    | 17.304 | 0.516   |             | 19.378   | 18.667 | 1.038   |             |
|                    | <b>V3</b>     | -17.737  | 16.661 | -1.065  |             | 23.262   | 19.248 | 1.209   |             |
|                    | <b>V4</b>     | 4.195    | 17.187 | 0.244   |             | 18.715   | 19.106 | 0.980   |             |
|                    | <b>V5</b>     | 9.207    | 16.954 | 0.543   |             | 3.184    | 18.945 | 0.168   |             |
| <b>T0</b>          |               | -206.866 | 14.973 | -13.816 | < 2e-16 *** | -229.778 | 14.470 | -15.880 | < 2e-16 *** |
| <b>OEA</b>         |               |          |        |         |             |          |        |         |             |
| <b>(Intercept)</b> |               | 187.325  | 25.163 | 7.445   |             | 200.050  | 27.570 | 7.257   |             |

|                                                                                                                                                                                                                                                    |               |          |        |         |                      |          |        |         |                       |
|----------------------------------------------------------------------------------------------------------------------------------------------------------------------------------------------------------------------------------------------------|---------------|----------|--------|---------|----------------------|----------|--------|---------|-----------------------|
| <b>Dose</b>                                                                                                                                                                                                                                        |               |          |        |         | 0.724                |          |        |         | <b>0.025 *</b>        |
|                                                                                                                                                                                                                                                    | <b>20 mg</b>  | -12.610  | 15.044 | -0.838  |                      | -31.310  | 16.100 | -1.944  |                       |
|                                                                                                                                                                                                                                                    | <b>50 mg</b>  | -21.349  | 15.707 | -1.359  |                      | -49.550  | 16.360 | -3.028  |                       |
|                                                                                                                                                                                                                                                    | <b>100 mg</b> | -15.261  | 15.428 | -0.989  |                      | -27.930  | 16.370 | -1.706  |                       |
|                                                                                                                                                                                                                                                    | <b>200 mg</b> | -8.340   | 15.195 | -0.549  |                      | -43.880  | 16.360 | -2.682  |                       |
| <b>Visit</b>                                                                                                                                                                                                                                       |               |          |        |         | 0.779                |          |        |         | 0.315                 |
|                                                                                                                                                                                                                                                    | <b>V2</b>     | 5.594    | 15.713 | 0.356   |                      | 14.530   | 16.590 | 0.876   |                       |
|                                                                                                                                                                                                                                                    | <b>V3</b>     | -8.621   | 15.102 | -0.571  |                      | 34.210   | 17.060 | 2.005   |                       |
|                                                                                                                                                                                                                                                    | <b>V4</b>     | 11.356   | 15.560 | 0.730   |                      | 28.520   | 17.160 | 1.662   |                       |
|                                                                                                                                                                                                                                                    | <b>V5</b>     | 3.129    | 15.398 | 0.203   |                      | 20.300   | 16.740 | 1.213   |                       |
| <b>T0</b>                                                                                                                                                                                                                                          |               | -217.183 | 12.966 | -16.751 | <b>&lt;2e-16 ***</b> | -246.030 | 12.340 | -19.940 | <b>&lt; 2e-16 ***</b> |
| <b>AEA, anandamide; Cmin, Minimum Concentration; OEA, oleoylethanolamide; PEA, palmitoylethanolamide; SE, Standard Error; T0, Pre-ingestion timepoint</b><br><b>. Signifies p &lt; 0.100; * Signifies p &lt; 0.050; *** Signifies p &lt; 0.001</b> |               |          |        |         |                      |          |        |         |                       |

AEA

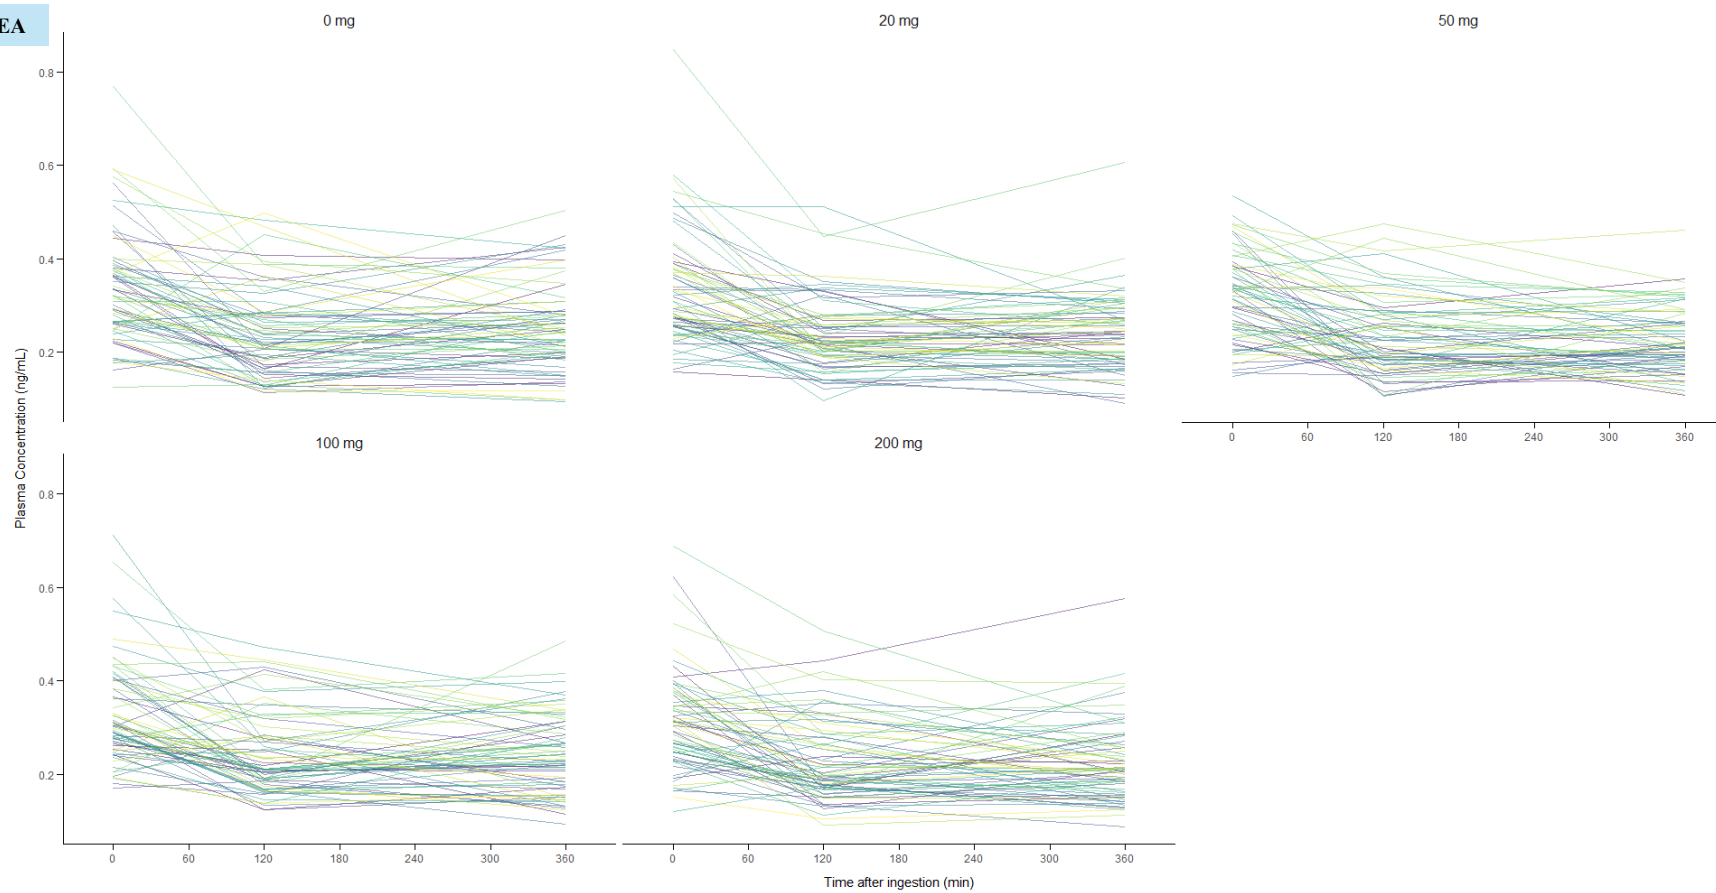

Supplementary Figure S1. Individual Trajectories of Plasma AEA Levels Across Timepoints by CBD Dose.

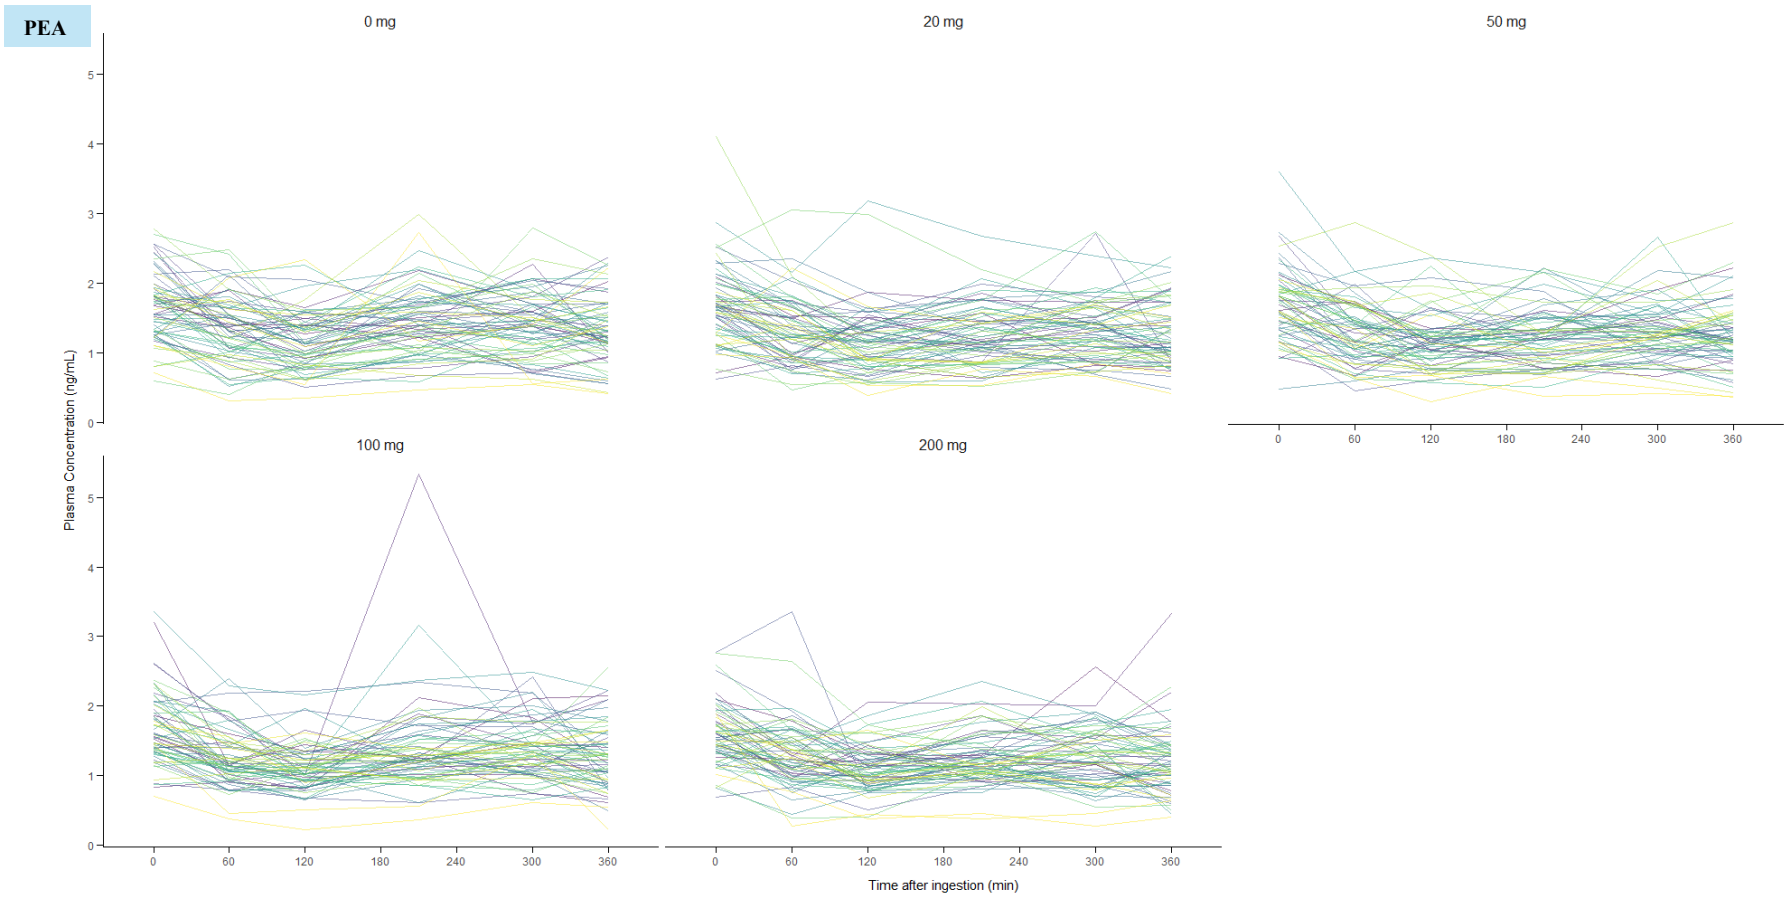

Supplementary Figure S2. Individual Trajectories of Plasma PEA Levels Across Timepoints by CBD Dose.

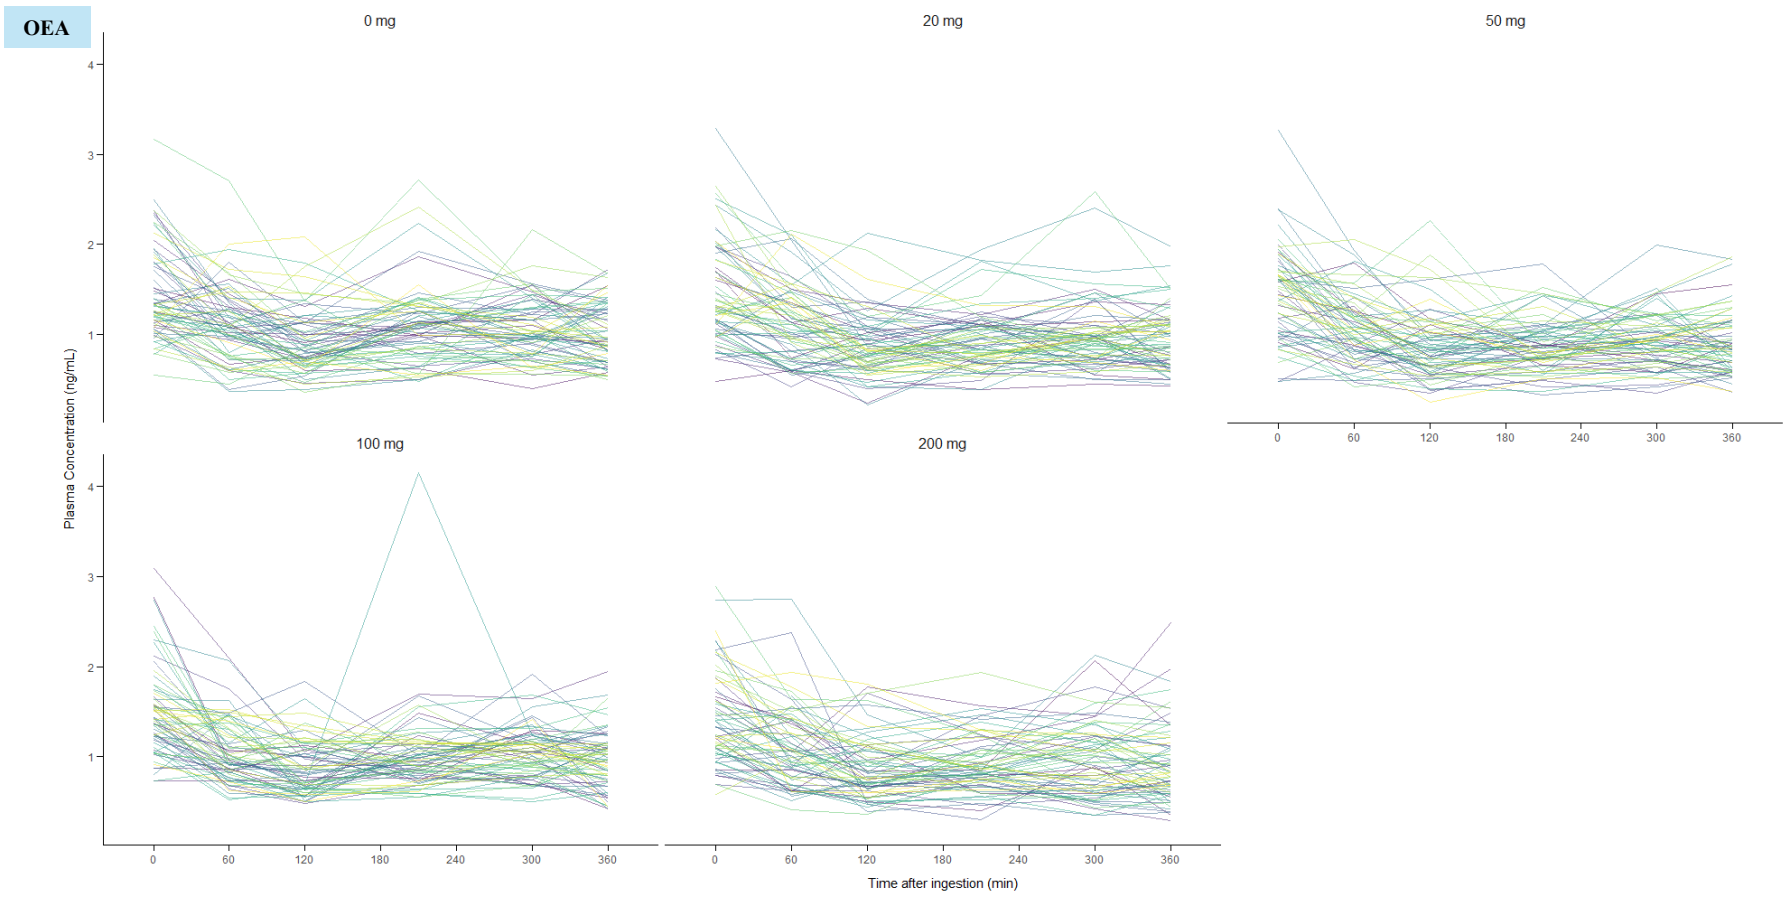

Supplementary Figure S3. Individual Trajectories of Plasma OEA Levels Across Timepoints by CBD Dose.

## Supplementary Method S1: Analytical Methodology for AEA

---

**Title:** LC-MS/MS Method for the determination of Arachidonoyl ethanolamide in Human Plasma.

**Project:** 2023-10502\_CBD-LD\_ING

François-Olivier Hébert Ph.D.  
Research Associate  
Faculty of Medicine  
Département de Psychiatrie et Addiction  
Université de Montréal

Didier Jutras-Aswad M.D., M.Sc.  
Researcher-clinician Associate Professor  
Faculty of Medicine  
Département de Psychiatrie et Addiction  
Université de Montréal

**Author:**



---

Fleur Gaudette, M.Sc. Chemist  
Supervisor  
Pharmacokinetics Core Facility  
CRCHUM

**Date:** 2024-11-26

## TABLE OF CONTENTS

|                                         |    |
|-----------------------------------------|----|
| 1. Chemical Composition .....           | 16 |
| 2. Analytical Procedure .....           | 17 |
| 2.1 Reagents.....                       | 17 |
| 2.2 Sample preparation .....            | 17 |
| 2.3 Chromatographic conditions.....     | 17 |
| 2.4 Mass spectrometric conditions ..... | 18 |
| 3. Chromatograms .....                  | 19 |

## LIST OF FIGURES

|                                                                                                                                                                      |    |
|----------------------------------------------------------------------------------------------------------------------------------------------------------------------|----|
| Figure 1: Chemical structures, formulae, and molecular weights of d <sub>0</sub> -AEA, d <sub>4</sub> -AEA and d <sub>8</sub> -AEA. ....                             | 16 |
| Figure 2: Reconstructed ion chromatograms for d <sub>4</sub> -AEA m/z 352.3 → 66.1, d <sub>8</sub> -AEA (IS) 356.4 → 63.1 and d <sub>0</sub> -AEA 348.3 → 62.1 ..... | 19 |

## LIST OF TABLES

|                                                      |    |
|------------------------------------------------------|----|
| Table 1: Mass spectrometry operating conditions..... | 18 |
|------------------------------------------------------|----|

## Arachidonoyl ethanolamide in Human Plasma

(Dr. Didier Jutras-Aswad)

### Chemical Composition

The chemical structures, formulae, and molecular weights of arachidonoyl ethanolamide ( $d_0$ -AEA) and its isotopologues  $d_4$ -AEA and  $d_8$ -AEA are depicted in figure 1.

**Figure 1: Chemical structures, formulae, and molecular weights of  $d_0$ -AEA,  $d_4$ -AEA and  $d_8$ -AEA.**

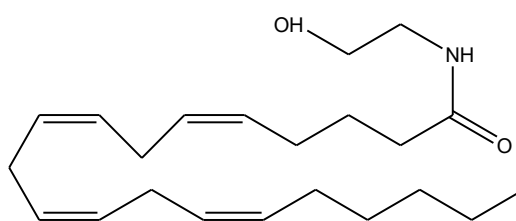

**$d_0$ -AEA (target analyte)**  
 $C_{22}H_{37}NO_2$   
Mol. Wt.: 347.53

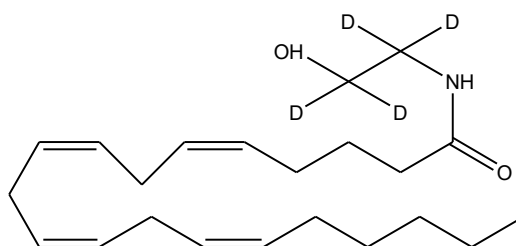

**$d_4$ -AEA (surrogate analyte)**  
 $C_{22}H_{33}D_4NO_2$   
Mol. Wt.: 351.56

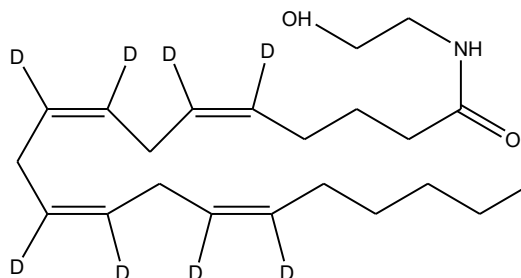

**$d_8$ -AEA (internal standard)**  
 $C_{22}H_{29}D_8NO_2$   
Mol. Wt.: 355.58

### *Analytical Procedure*

Quantitation of biomarkers by LC–MS/MS is complicated by the presence of endogenous analytes in the matrix being analyzed. Due to the endogenous nature of d<sub>0</sub>-AEA, a surrogate analyte approach will be used. This approach involves the use of two stable-isotope-labeled standards (d<sub>4</sub>-AEA and d<sub>8</sub>-AEA) to be used as a surrogate analyte and internal standard enabling calibration in the actual biological matrix.

### *Reagents*

d<sub>0</sub>-AEA, d<sub>4</sub>-AEA and d<sub>8</sub>-AEA were purchased from Cayman Chemical (Ann Arbor, MI, USA) and received in ampoules as certified solutions containing 50.0 mg/mL, 5.0 mg/mL and 1.0 mg/mL dissolved in ethanol for d<sub>0</sub>-AEA, d<sub>4</sub>-AEA and in methyl acetate for d<sub>8</sub>-AEA. Human plasma containing EDTA as anticoagulant was purchased from Bioreclamation (Westbury, NY, USA). Other chemicals, including, methanol, acetonitrile, ammonium formate and water were purchased from Fisher Scientific (Fair Lawn, NJ, USA).

### *Sample preparation*

Using a protein precipitation as sample preparation technique, d<sub>0</sub>-AEA was extracted from human plasma. One thousand microliters of internal standard solution (2.4 ng/mL d<sub>8</sub>-AEA in methanol) was added to an aliquot of two hundred and fifty microliters of sample. The sample was vortexed for approximately 5 seconds and let stand for a period of 10 minutes, then centrifuged at 16000 g for 10 minutes. The supernatant was transferred into a clean 16 x 100 mm borosilicate tube and evaporated to dryness at 40°C under a gentle stream of nitrogen. The dried extract was resuspended with 80 µL of 50% (v/v) methanol in water solution and transferred to an injection vial for analysis.

### *Chromatographic conditions*

A gradient mobile phase was used with an Agilent Zorbax Eclipse Plus C18 RRHD analytical column (100 x 2.1 mm I.D., 1.8 µm) operating at 40°C. The initial mobile phase condition consisted of acetonitrile containing 0.1% (v/v) formic acid and 10 mM of ammonium formate in type 1 water pH 3.0 at a ratio of 60:40, respectively, and this ratio was maintained for 1 min. From 1 to 5 min a linear gradient was applied up to a ratio of 95:5 and maintained for 1 min. At 6.1 min, the mobile phase composition was reverted to the original conditions and the column was allowed

to equilibrate for 2 min for a total run time of 8 min. The flow rate was fixed at 300  $\mu$ L/min and d<sub>0</sub>-AEA and its isotopically labelled standards (d<sub>4</sub>-AEA and d<sub>8</sub>-AEA) eluted at 5.3 min. Five microliters of the extracted sample was injected and the total run time was set at 12 min.

#### *Mass spectrometric conditions*

The mass spectrometer was interfaced with the UPLC system using a pneumatic assisted heated electrospray ion source. MS detection was performed in positive ion mode, using selected reaction monitoring (SRM). In order to optimize the MS/MS parameters, standard solutions of d<sub>0</sub>-AEA, d<sub>4</sub>-AEA and d<sub>8</sub>-AEA were infused into the mass spectrometer. The following parameters were obtained. Nitrogen was used for the sheath and auxiliary gases and was set at 50 and 15 arbitrary units. The HESI electrode was set to 3500V. The capillary and vaporizer temperatures were set at 350°C and 400°C, respectively. Argon was used as collision gas at a pressure of 2.5 mTorr. The precursor-ion reactions and the collision energy for d<sub>0</sub>-AEA, d<sub>4</sub>-AEA and d<sub>8</sub>-AEA are in table 1. Total cycle time was set at 0.25 seconds. Peak width of Q1 and Q3 were both set at 0.7 FWHM.

**Table 1: Mass spectrometry operating conditions**

| Compound            | Precursor (m/z) | Product (m/z) | Collision Energy (V) | RF Lens (V) |
|---------------------|-----------------|---------------|----------------------|-------------|
| d <sub>0</sub> -AEA | 348.3           | 62.1          | 15                   | 64          |
| d <sub>4</sub> -AEA | 352.3           | 66.1          | 15                   | 65          |
| d <sub>8</sub> -AEA | 356.3           | 63.1          | 15                   | 66          |

## Chromatograms

Representative chromatograms obtained upon analysis of blank human plasma, a zero standard and an extracted LLOQ standard are shown in figure 2. The overlay of an extracted LLOQ standard (blue line) and an extracted blank human plasma sample (red line) for the SRM transition of d<sub>4</sub>-AEA are shown in figure 2a. An overlay of an extracted zero standard (blue line) and an extracted blank human plasma sample (red line) for the SRM transition of d<sub>8</sub>-AEA are in figure 2b and the endogenous level of d<sub>0</sub>-AEA in the blank human plasma lot extracted are shown in figure 2c.

**Figure 2: Reconstructed ion chromatograms for d<sub>4</sub>-AEA m/z 352.3 → 66.1, d<sub>8</sub>-AEA (IS) 356.4 → 63.1 and d<sub>0</sub>-AEA 348.3 → 62.1**

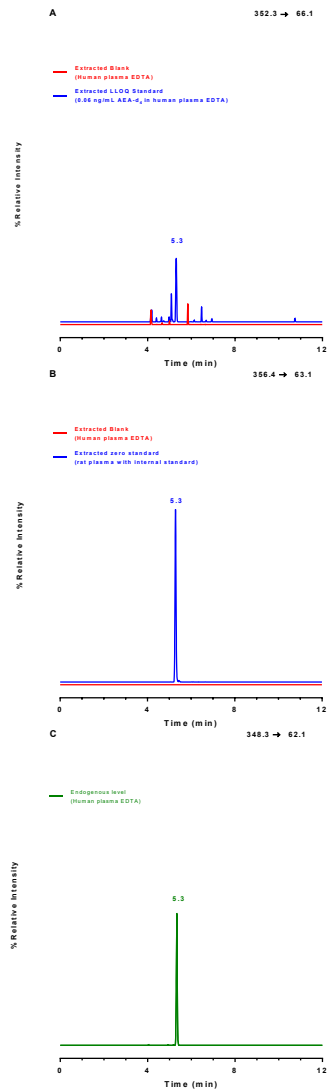

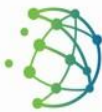

## Supplementary Method S2: Analytical Methodology for PEA and OEA

---

**Title:** LC-MS/MS Method for the determination of Palmitoyl Ethanolamide and Oleoyl Ethanolamide in Human Plasma.

**Project:** 2023-10502\_CBD-LD\_ING

François-Olivier Hébert Ph.D.  
Research Associate  
Faculty of Medicine  
Department of Psychiatry and Addiction  
Université de Montréal

Didier Jutras-Aswad M.D., M.Sc.  
Researcher-clinician Associate Professor  
Faculty of Medicine  
Department of Psychiatry and Addiction  
Université de Montréal

**Author:**



---

Fleur Gaudette, M.Sc. Chemist  
Supervisor  
Pharmacokinetics Core Facility  
CRCHUM

**Date:** 2024-11-26

## TABLE OF CONTENTS

|                                         |    |
|-----------------------------------------|----|
| 1. Chemical Composition .....           | 22 |
| 2. Analytical Procedure .....           | 23 |
| 2.1 Reagents.....                       | 23 |
| 2.2 Sample preparation .....            | 23 |
| 2.3 Chromatographic conditions.....     | 23 |
| 2.4 Mass spectrometric conditions ..... | 24 |
| 3. Chromatograms .....                  | 25 |

## LIST OF FIGURES

|                                                                                                                                                                                                                                                                                                                                                                                                                                                                                                                                                                                                                      |    |
|----------------------------------------------------------------------------------------------------------------------------------------------------------------------------------------------------------------------------------------------------------------------------------------------------------------------------------------------------------------------------------------------------------------------------------------------------------------------------------------------------------------------------------------------------------------------------------------------------------------------|----|
| Figure 1: Chemical structures, formulae, and molecular weights of d <sub>0</sub> -PEA, d <sub>0</sub> -OEA and the internal standards (d <sub>4</sub> -PEA & d <sub>4</sub> -OEA).....                                                                                                                                                                                                                                                                                                                                                                                                                               | 22 |
| Figure 2: Reconstructed ion chromatograms for d <sub>0</sub> -PEA, d <sub>0</sub> -OEA, d <sub>4</sub> -PEA and d <sub>4</sub> -OEA. (A) and (C) represent an overlay of an extracted blank surrogate matrix (red line), an LLOQ standard (blue line) and an extracted human plasma sample (green line) for d <sub>0</sub> -PEA and d <sub>0</sub> -OEA m/z 300 → 62 and 326 → 62, respectively. (B) and (D) represent an overlay of an extracted blank surrogate matrix (red line) and an extracted zero standard (blue line) for d <sub>4</sub> -PEA d <sub>4</sub> -OEA m/z 304 → 66 and 330 → 66, respectively.. | 25 |

## LIST OF TABLES

|                                                      |    |
|------------------------------------------------------|----|
| Table 1: Mass spectrometry operating conditions..... | 24 |
|------------------------------------------------------|----|

## Palmitoyl Ethanolamide and Oleoyl Ethanolamide in Human Plasma

(Dr. François-Olivier Hébert/Dr. Didier Jutras-Aswad)

### Chemical Composition

The chemical structures, formulae, and molecular weights of palmitoyl ethanolamide (d<sub>0</sub>-PEA), oleoyl ethanolamide (d<sub>0</sub>-OEA) and the internal standards (d<sub>4</sub>-PEA and d<sub>4</sub>-OEA), are depicted in Figure 1.

**Figure 3: Chemical structures, formulae, and molecular weights of d<sub>0</sub>-PEA, d<sub>0</sub>-OEA and the internal standards (d<sub>4</sub>-PEA & d<sub>4</sub>-OEA)**

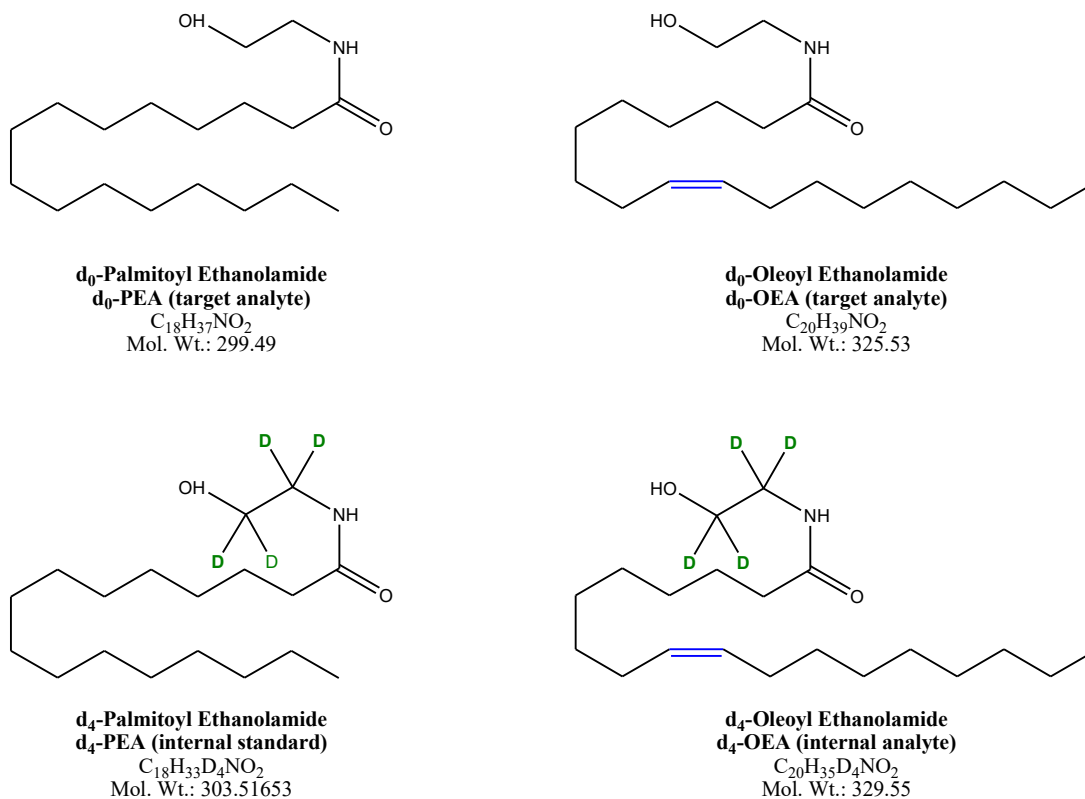

### *Analytical Procedure*

Quantitation of biomarkers by LC–MS/MS is complicated by the presence of endogenous analytes in the matrix being analyzed. Due to the endogenous nature of d<sub>0</sub>-PEA and d<sub>0</sub>-OEA, a surrogate matrix approach will be used. This approach involves using an authentic standard spiked into a surrogate matrix devoid of the target analyte.

### *Reagents*

d<sub>0</sub>-PEA, d<sub>0</sub>-OEA, d<sub>4</sub>-PEA, and d<sub>4</sub>-OEA were purchased from Cayman Chemical (Ann Arbor, MI, USA) and d<sub>4</sub>-PEA and d<sub>4</sub>-OEA were received in ampoules as certified solutions containing 1.0 mg/mL dissolved in ethanol. Hexanes, acetonitrile, methanol and water were purchased from EMD Millipore Corporation (Burlington, MA, USA). Isopropyl alcohol (IPA) was purchased from Mat Laboratories (Québec, QC, Canada), Ethanol (EtOH) was purchase from Anachemia through VWR (Mississauga, On, Canada). Other chemicals, including, ammonium formate, and formic acid were purchased from Fisher Scientific (Fair Lawn, NJ, USA).

### *Sample preparation*

Using a liquid-liquid extraction procedure, d<sub>0</sub>-PEA and d<sub>0</sub>-OEA were extracted from human plasma. Twenty five µL of internal standard solution (72.0 ng/mL of d<sub>4</sub>-PEA and d<sub>4</sub>-OEA in EtOH) was added to an aliquot of 300 µL of plasma in a 13 x 100 mm borosilicate screw cap tube. Two mL of extraction solvent (90:10 hexanes:IPA) was added to the sample followed by two hundred and fifty µL of water. The tube was capped and gently mixed by rotation for 10 minutes. The sample was then centrifuged at approximately 4500 g for 10 min at 5°C and the organic layer was transferred into a clean 13 x 100 mm borosilicate tube and evaporated to dryness at 30°C under a gentle stream of nitrogen (5-10 psi). The dried extract was re-suspended with 75 µL of reconstitution solution (50:50 methanol:H<sub>2</sub>O) and transferred to a micro injection vial for analysis.

### *Chromatographic conditions*

A gradient mobile phase was used with an Agilent Zorbax Eclipse Plus C18 RRHD analytical column (100 x 2.1 mm I.D., 1.8 µm) and Zorbax Eclipse Plus C18 (5.0 x 2.1 mm I.D., 1.8 µm) guard operating operating at 40°C. The initial mobile phase condition consisted of acetonitrile containing 0.1 % (v/v) formic acid and 10 mM of ammonium formate in type 1 water pH 3.0 at a

ratio of 60:40, respectively, and this ratio was maintained for 0.5 min. From 0.5 to 14 min a linear gradient was applied up to a ratio of 95:5 and maintained for 1 min. At 15.1 min, the mobile phase composition was reverted to the original conditions and the column was allowed to equilibrate for 5 min for a total run time of 20 min. The flow rate was fixed at 300  $\mu\text{L}/\text{min}$  and five microliters of the extracted sample was injected.

#### *Mass spectrometric conditions*

The mass spectrometer was interfaced with the UPLC system using a pneumatic assisted heated electrospray ion source. MS detection was performed in positive ion mode, using selected reaction monitoring (SRM). In order to optimize the MS/MS parameters, standard solutions of  $\text{d}_0\text{-PEA}$ ,  $\text{d}_0\text{-OEA}$ ,  $\text{d}_4\text{-PEA}$  and  $\text{d}_4\text{-OEA}$  were infused into the mass spectrometer. The following parameters were obtained. Nitrogen was used for the sheath and auxiliary gases and was set at 50 and 15 arbitrary units. The HESI electrode was set to 3500V. The capillary and vaporizer temperatures were set at 350°C and 400°C, respectively. Argon was used as collision gas at a pressure of 2.5 mTorr. The precursor-ion reactions and the collision energy for PEA, OEA,  $\text{d}_4\text{-PEA}$  and  $\text{d}_4\text{-OEA}$  are in table 1. Total cycle time was set at 0.25 seconds. Peak width of Q1 and Q3 were both set at 0.7 FWHM.

**Table 2: Mass spectrometry operating conditions**

| Compound                | Polarity | Precursor (m/z) | Product (m/z) | Collision Energy (V) | RF Lens (V) |
|-------------------------|----------|-----------------|---------------|----------------------|-------------|
| $\text{d}_0\text{-PEA}$ | Positive | 300.3           | 62.1          | 13.2                 | 59          |
| $\text{d}_4\text{-PEA}$ | Positive | 304.3           | 66.1          | 13.2                 | 64          |
| $\text{d}_0\text{-OEA}$ | Positive | 326.3           | 62.1          | 14.9                 | 68          |
| $\text{d}_4\text{-OEA}$ | Positive | 330.3           | 66.1          | 14.9                 | 64          |

## Chromatograms

Representative chromatograms obtained upon analysis of an extracted blank surrogate matrix, an extracted LLOQ standard prepared at 0.30 ng/mL for d<sub>0</sub>-PEA and d<sub>0</sub>-OEA in surrogate matrix and an extracted human plasma sample are shown in Figure 2.

**Figure 4:** Reconstructed ion chromatograms for d<sub>0</sub>-PEA, d<sub>0</sub>-OEA, d<sub>4</sub>-PEA and d<sub>4</sub>-OEA. (A) and (C) represent an overlay of an extracted blank surrogate matrix (red line), an LLOQ standard (blue line) and an extracted human plasma sample (green line) for d<sub>0</sub>-PEA and d<sub>0</sub>-OEA m/z 300 → 62 and 326 → 62, respectively. (B) and (D) represent an overlay of an extracted blank surrogate matrix (red line) and an extracted zero standard (blue line) for d<sub>4</sub>-PEA d<sub>4</sub>-OEA m/z 304 → 66 and 330 → 66, respectively

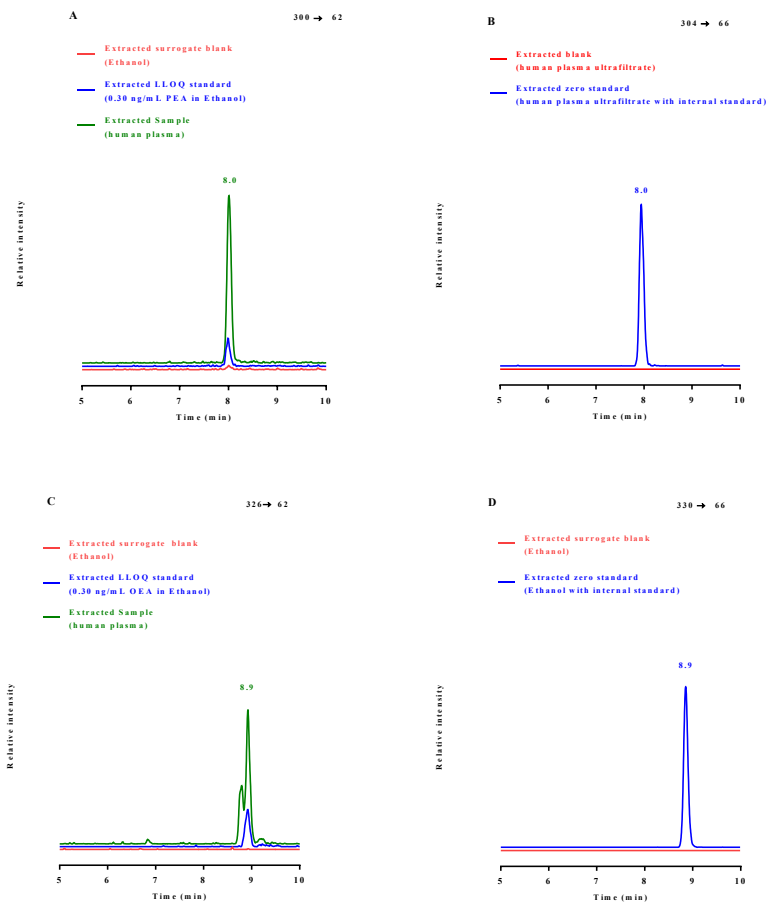

Supplement: MOESM1 [file 42238_2025_356_MOESM1_ESM.pdf]
